# Supplementary material
Source: MDPI journal article supplement (https://www.mdpi.com/2075-163X/13/2/290)
Supplement: s1 [file s1]

**Table S1. Zircon LA-ICP-MS U-Pb data of the Keri rhyolites in the EKOB.**

[illegible]

|             |    |     |     |      |        |        |        |        |        |        |      |     |      |    |     |   |
|-------------|----|-----|-----|------|--------|--------|--------|--------|--------|--------|------|-----|------|----|-----|---|
| XRD111.3.1  | 17 | 267 | 484 | 0.55 | 0.0499 | 0.0013 | 0.2362 | 0.0064 | 0.0343 | 0.0002 | 191  | 1   | 215  | 6  | 218 | 2 |
| XRD111.3.2  | 14 | 223 | 412 | 0.54 | 0.0531 | 0.0016 | 0.2471 | 0.0077 | 0.0338 | 0.0002 | 331  | 1   | 224  | 7  | 214 | 2 |
| XRD111.3.3  | 22 | 357 | 619 | 0.58 | 0.0528 | 0.0012 | 0.2463 | 0.0057 | 0.0338 | 0.0003 | 319  | 1   | 224  | 5  | 215 | 2 |
| XRD111.3.4  | 23 | 386 | 683 | 0.57 | 0.0534 | 0.0014 | 0.2363 | 0.0062 | 0.0321 | 0.0002 | 348  | 1   | 215  | 6  | 204 | 2 |
| XRD111.3.5  | 15 | 515 | 350 | 1.47 | 0.0508 | 0.0017 | 0.2456 | 0.0082 | 0.0351 | 0.0003 | 231  | 1   | 223  | 7  | 222 | 2 |
| XRD111.3.6  | 67 | 683 | 707 | 0.97 | 0.3338 | 0.0040 | 2.4147 | 0.0330 | 0.0524 | 0.0004 | 2218 | 122 | 1247 | 17 | 329 | 2 |
| XRD111.3.7  | 14 | 178 | 387 | 0.46 | 0.0522 | 0.0014 | 0.2555 | 0.0070 | 0.0355 | 0.0003 | 293  | 1   | 231  | 6  | 225 | 2 |
| XRD111.3.8  | 24 | 401 | 703 | 0.57 | 0.0544 | 0.0010 | 0.2393 | 0.0044 | 0.0319 | 0.0002 | 389  | 1   | 218  | 4  | 202 | 1 |
| XRD111.3.9  | 20 | 317 | 584 | 0.54 | 0.0516 | 0.0011 | 0.2265 | 0.0052 | 0.0318 | 0.0002 | 270  | 1   | 207  | 5  | 202 | 1 |
| XRD111.3.10 | 24 | 595 | 625 | 0.95 | 0.0550 | 0.0011 | 0.2407 | 0.0051 | 0.0318 | 0.0002 | 412  | 1   | 219  | 5  | 201 | 1 |
| XRD111.3.11 | 20 | 280 | 586 | 0.48 | 0.0526 | 0.0010 | 0.2289 | 0.0045 | 0.0316 | 0.0002 | 311  | 1   | 209  | 4  | 200 | 1 |
| XRD111.3.12 | 22 | 324 | 636 | 0.51 | 0.0517 | 0.0010 | 0.2282 | 0.0046 | 0.0320 | 0.0002 | 273  | 1   | 209  | 4  | 203 | 1 |
| XRD111.3.13 | 21 | 295 | 598 | 0.49 | 0.0536 | 0.0011 | 0.2355 | 0.0050 | 0.0319 | 0.0002 | 354  | 1   | 215  | 5  | 202 | 1 |
| XRD111.3.14 | 20 | 283 | 587 | 0.48 | 0.0535 | 0.0011 | 0.2329 | 0.0051 | 0.0316 | 0.0002 | 351  | 1   | 213  | 5  | 200 | 1 |
| XRD111.3.15 | 23 | 347 | 639 | 0.54 | 0.0515 | 0.0010 | 0.2201 | 0.0044 | 0.0310 | 0.0002 | 264  | 1   | 202  | 4  | 197 | 1 |
| XRD111.3.16 | 23 | 346 | 684 | 0.51 | 0.0531 | 0.0015 | 0.2245 | 0.0063 | 0.0307 | 0.0002 | 331  | 1   | 206  | 6  | 195 | 1 |
| XRD111.3.17 | 18 | 236 | 516 | 0.46 | 0.0533 | 0.0012 | 0.2315 | 0.0055 | 0.0315 | 0.0002 | 343  | 1   | 211  | 5  | 200 | 1 |
| XRD111.3.18 | 20 | 292 | 592 | 0.49 | 0.0527 | 0.0012 | 0.2282 | 0.0054 | 0.0314 | 0.0002 | 315  | 1   | 209  | 5  | 199 | 1 |
| XRD111.3.19 | 20 | 368 | 526 | 0.70 | 0.0790 | 0.0024 | 0.3573 | 0.0120 | 0.0325 | 0.0003 | 1172 | 1   | 310  | 10 | 206 | 2 |
| XRD111.3.20 | 20 | 345 | 596 | 0.58 | 0.0492 | 0.0011 | 0.2128 | 0.0051 | 0.0314 | 0.0002 | 159  | 1   | 196  | 5  | 199 | 1 |
| XRD111.3.21 | 16 | 273 | 476 | 0.57 | 0.0508 | 0.0013 | 0.2205 | 0.0056 | 0.0315 | 0.0002 | 232  | 1   | 202  | 5  | 200 | 1 |

**Table S2. Whole-rock major and trace element data of the Keri rhyolites in the EKOB.**

| Sample           | XRD110/<br>2 | XRD110<br>/3 | XRD110<br>/4 | XRD110<br>/5 | XRD110<br>/6 | XRD111<br>/1 | XRD111<br>/3 | XRD111<br>/4 | XRD112<br>/1 | XRD112<br>/2 | XRD112<br>/3 | KR570-<br>1 | KR570-<br>2 | KR570-<br>3 | KR570-<br>4 | KR570-<br>5 |
|------------------|--------------|--------------|--------------|--------------|--------------|--------------|--------------|--------------|--------------|--------------|--------------|-------------|-------------|-------------|-------------|-------------|
| SiO <sub>2</sub> | 75.28        | 75.91        | 76.02        | 75.60        | 75.78        | 75.84        | 75.40        | 75.00        | 75.72        | 75.61        | 75.29        | 73.26       | 73.11       | 72.95       | 73.56       | 73.10       |

|                                 |        |        |        |        |        |        |        |        |        |        |        |        |        |        |        |        |
|---------------------------------|--------|--------|--------|--------|--------|--------|--------|--------|--------|--------|--------|--------|--------|--------|--------|--------|
| TiO <sub>2</sub>                | 0.11   | 0.10   | 0.11   | 0.11   | 0.11   | 0.11   | 0.11   | 0.10   | 0.11   | 0.11   | 0.11   | 0.11   | 0.11   | 0.11   | 0.10   | 0.11   |
| Al <sub>2</sub> O <sub>3</sub>  | 12.47  | 12.54  | 12.50  | 12.48  | 12.02  | 12.46  | 12.34  | 12.38  | 12.45  | 12.50  | 12.43  | 13.14  | 13.30  | 13.30  | 13.14  | 12.93  |
| TFe <sub>2</sub> O <sub>3</sub> | 1.90   | 1.87   | 1.88   | 1.74   | 2.05   | 1.77   | 1.82   | 1.84   | 1.86   | 1.85   | 1.84   | 1.75   | 1.85   | 1.75   | 1.77   | 1.76   |
| MnO                             | 0.03   | 0.03   | 0.03   | 0.02   | 0.03   | 0.03   | 0.02   | 0.02   | 0.02   | 0.03   | 0.02   | 0.03   | 0.04   | 0.03   | 0.03   | 0.04   |
| MgO                             | 0.01   | 0.05   | 0.05   | 0.03   | 0.01   | 0.01   | 0.08   | 0.03   | 0.01   | 0.01   | 0.04   | 0.08   | 0.05   | 0.05   | 0.06   | 0.05   |
| CaO                             | 0.50   | 0.54   | 0.47   | 0.36   | 0.36   | 0.44   | 0.54   | 0.39   | 0.47   | 0.52   | 0.47   | 0.50   | 0.54   | 0.44   | 0.57   | 0.44   |
| Na <sub>2</sub> O               | 3.77   | 2.97   | 3.39   | 2.12   | 2.85   | 3.71   | 3.47   | 3.64   | 3.90   | 3.68   | 3.64   | 2.73   | 4.04   | 2.77   | 3.75   | 2.07   |
| K <sub>2</sub> O                | 4.90   | 5.58   | 4.98   | 6.78   | 5.88   | 5.03   | 5.24   | 5.27   | 4.63   | 5.01   | 5.13   | 6.94   | 5.65   | 7.26   | 5.79   | 8.03   |
| P <sub>2</sub> O <sub>5</sub>   | 0.01   | 0.01   | 0.01   | 0.01   | 0.01   | 0.01   | 0.01   | 0.01   | 0.01   | 0.01   | 0.01   | 0.01   | 0.01   | 0.01   | 0.01   | 0.01   |
| LOI                             | 0.45   | 0.53   | 0.64   | 0.42   | 0.40   | 0.44   | 0.70   | 0.52   | 0.37   | 0.57   | 0.55   | 0.86   | 0.64   | 0.70   | 0.70   | 0.90   |
| Total                           | 99.43  | 100.13 | 100.08 | 99.67  | 99.50  | 99.85  | 99.73  | 99.20  | 99.55  | 99.90  | 99.53  | 99.41  | 99.34  | 99.37  | 99.48  | 99.43  |
| A/CNK                           | 1.00   | 1.05   | 1.06   | 1.09   | 1.03   | 1.01   | 1.00   | 1.00   | 1.01   | 1.01   | 1.00   | 1.02   | 0.97   | 1.01   | 0.98   | 1.00   |
| A/NK                            | 1.08   | 1.15   | 1.14   | 1.15   | 1.09   | 1.08   | 1.08   | 1.06   | 1.09   | 1.09   | 1.08   | 1.09   | 1.04   | 1.07   | 1.06   | 1.07   |
| σ                               | 2.33   | 2.22   | 2.12   | 2.43   | 2.32   | 2.33   | 2.34   | 2.48   | 2.22   | 2.32   | 2.38   | 3.09   | 3.12   | 3.36   | 2.98   | 3.39   |
| AR                              | 5.03   | 4.77   | 4.64   | 5.52   | 5.78   | 5.20   | 5.18   | 5.62   | 4.89   | 5.01   | 5.25   | 5.87   | 5.67   | 6.41   | 5.58   | 7.18   |
| Li                              | 11.10  | 10.26  | 9.72   | 10.31  | 12.89  | 6.50   | 6.78   | 5.14   | 11.30  | 6.99   | 8.58   | 21.40  | 35.30  | 20.30  | 32.70  | 22.20  |
| Be                              | 6.71   | 7.01   | 7.28   | 5.76   | 9.42   | 9.65   | 6.04   | 5.74   | 7.03   | 6.43   | 6.53   | 7.62   | 7.89   | 8.18   | 7.16   | 7.27   |
| Sc                              | 1.67   | 1.69   | 1.67   | 1.62   | 2.94   | 1.56   | 1.69   | 1.53   | 1.48   | 1.51   | 1.53   | 0.35   | 0.35   | 0.47   | 0.46   | 1.67   |
| V                               | 0.95   | 0.70   | 0.68   | 0.63   | 0.31   | 0.59   | 0.90   | 0.58   | 1.43   | 0.65   | 0.56   | 1.74   | 1.58   | 1.29   | 1.25   | 1.40   |
| Cr                              | 1.11   | 3.77   | 2.28   | 0.39   | 0.79   | 30.64  | 1.48   | 2.22   | 1.45   | 1.62   | 1.73   | 1.18   | 1.59   | 1.18   | 1.34   | 1.31   |
| Ni                              | 19.99  | 20.54  | 20.47  | 15.94  | 19.61  | 37.57  | 19.95  | 21.10  | 20.73  | 19.45  | 19.72  | 0.30   | 0.32   | 0.42   | 0.36   | 0.42   |
| Co                              | 0.16   | 0.14   | 0.13   | 0.17   | 0.08   | 0.80   | 0.18   | 0.27   | 0.33   | 0.36   | 0.34   | 0.05   | 0.04   | 0.03   | 0.03   | 0.06   |
| Cu                              | 3.57   | 4.83   | 3.31   | 4.30   | 12.18  | 4.92   | 3.46   | 4.81   | 3.01   | 1.58   | 3.36   | 5.80   | 7.66   | 7.07   | 7.80   | 9.01   |
| Zn                              | 116.49 | 91.99  | 157.21 | 95.80  | 126.64 | 145.58 | 111.45 | 90.00  | 65.41  | 80.39  | 88.19  | 115.00 | 126.00 | 121.00 | 116.00 | 110.00 |
| Ga                              | 24.78  | 24.66  | 24.71  | 21.88  | 24.37  | 25.82  | 24.77  | 25.80  | 25.06  | 23.85  | 24.36  | 30.20  | 31.30  | 30.50  | 30.00  | 29.90  |
| Rb                              | 430.15 | 534.38 | 436.01 | 717.57 | 610.21 | 409.73 | 402.49 | 415.23 | 404.31 | 408.40 | 411.14 | 389.00 | 280.00 | 387.00 | 290.00 | 458.00 |

|    |        |        |        |        |        |        |        |        |        |        |        |        |        |        |        |        |
|----|--------|--------|--------|--------|--------|--------|--------|--------|--------|--------|--------|--------|--------|--------|--------|--------|
| Sr | 14.87  | 31.18  | 28.47  | 38.99  | 23.47  | 7.90   | 15.97  | 9.21   | 18.73  | 11.27  | 12.84  | 46.80  | 30.10  | 34.50  | 33.70  | 44.40  |
| Y  | 11.62  | 15.34  | 10.57  | 8.46   | 10.85  | 12.10  | 14.11  | 14.10  | 11.93  | 11.71  | 15.51  | 59.30  | 61.30  | 58.80  | 57.40  | 61.70  |
| Zr | 337.04 | 339.29 | 331.30 | 322.92 | 583.08 | 313.32 | 320.94 | 320.44 | 305.28 | 313.78 | 316.40 | 316.00 | 314.00 | 316.00 | 322.00 | 317.00 |
| Nb | 77.29  | 70.64  | 70.02  | 61.48  | 87.54  | 69.58  | 75.65  | 71.21  | 69.31  | 71.27  | 73.31  | 82.40  | 86.80  | 83.10  | 80.70  | 84.00  |
| Cd | 0.51   | 0.24   | 0.31   | 0.33   | 0.36   | 0.19   | 0.20   | 0.20   | 0.17   | 0.18   | 0.20   | 0.11   | 0.04   | 0.07   | 0.07   | 0.34   |
| Cs | 2.80   | 5.45   | 3.39   | 4.74   | 4.46   | 1.47   | 2.86   | 1.78   | 2.52   | 2.70   | 2.26   | 5.93   | 4.19   | 6.24   | 5.97   | 7.42   |
| Ba | 3.70   | 5.66   | 5.18   | 4.18   | 3.30   | 6.71   | 35.84  | 5.85   | 6.32   | 7.22   | 8.84   | 23.80  | 17.20  | 15.50  | 15.10  | 23.90  |
| La | 25.22  | 29.13  | 24.51  | 35.94  | 35.42  | 32.68  | 28.69  | 36.94  | 27.10  | 33.25  | 39.76  | 65.30  | 65.60  | 68.80  | 64.30  | 68.30  |
| Ce | 75.93  | 79.72  | 69.51  | 81.86  | 85.15  | 74.71  | 71.59  | 80.44  | 64.10  | 78.47  | 85.43  | 138.00 | 141.00 | 142.00 | 140.00 | 140.00 |
| Pr | 5.11   | 5.92   | 5.13   | 6.22   | 6.95   | 6.53   | 5.81   | 6.97   | 5.65   | 6.59   | 7.55   | 15.90  | 16.30  | 16.50  | 15.40  | 16.20  |
| Nd | 21.06  | 24.81  | 21.12  | 25.51  | 29.10  | 26.95  | 24.37  | 30.82  | 23.23  | 27.64  | 33.39  | 55.90  | 57.80  | 58.00  | 56.50  | 57.10  |
| Sm | 4.20   | 5.14   | 4.15   | 4.59   | 5.87   | 5.40   | 4.98   | 6.06   | 4.79   | 5.49   | 6.72   | 12.40  | 12.90  | 13.10  | 12.60  | 12.80  |
| Eu | 0.01   | 0.01   | 0.01   | 0.01   | 0.01   | 0.01   | 0.01   | 0.02   | 0.01   | 0.02   | 0.02   | 0.06   | 0.05   | 0.06   | 0.05   | 0.06   |
| Gd | 4.15   | 4.96   | 3.96   | 3.96   | 5.15   | 4.79   | 4.82   | 5.67   | 4.50   | 4.89   | 6.10   | 10.80  | 10.90  | 11.30  | 10.80  | 11.10  |
| Tb | 0.38   | 0.47   | 0.37   | 0.32   | 0.45   | 0.44   | 0.44   | 0.50   | 0.43   | 0.44   | 0.57   | 1.93   | 1.94   | 1.92   | 1.94   | 1.97   |
| Dy | 2.08   | 2.65   | 1.97   | 1.64   | 2.25   | 2.31   | 2.43   | 2.64   | 2.29   | 2.29   | 2.98   | 10.60  | 10.90  | 10.90  | 10.40  | 11.00  |
| Ho | 0.40   | 0.51   | 0.37   | 0.30   | 0.40   | 0.43   | 0.48   | 0.51   | 0.44   | 0.43   | 0.55   | 2.00   | 2.03   | 2.00   | 1.97   | 2.06   |
| Er | 1.12   | 1.43   | 1.00   | 0.75   | 1.04   | 1.18   | 1.33   | 1.34   | 1.20   | 1.11   | 1.49   | 5.72   | 5.71   | 5.72   | 5.60   | 5.80   |
| Tm | 0.15   | 0.19   | 0.13   | 0.10   | 0.12   | 0.15   | 0.18   | 0.17   | 0.16   | 0.14   | 0.19   | 0.84   | 0.86   | 0.86   | 0.84   | 0.89   |
| Yb | 0.88   | 1.21   | 0.76   | 0.54   | 0.76   | 0.92   | 1.08   | 1.06   | 0.95   | 0.86   | 1.09   | 5.02   | 5.14   | 5.21   | 4.96   | 5.24   |
| Lu | 0.13   | 0.17   | 0.11   | 0.08   | 0.11   | 0.13   | 0.16   | 0.15   | 0.13   | 0.13   | 0.16   | 0.77   | 0.80   | 0.78   | 0.76   | 0.82   |
| Hf | 7.30   | 7.14   | 7.03   | 7.01   | 12.08  | 6.82   | 7.05   | 6.96   | 6.69   | 6.89   | 6.85   | 10.70  | 11.00  | 10.80  | 11.30  | 10.80  |
| Ta | 2.18   | 1.36   | 1.54   | 1.51   | 0.92   | 1.40   | 2.44   | 1.98   | 1.73   | 1.93   | 2.70   | 5.71   | 5.98   | 5.80   | 5.70   | 5.87   |
| Pb | 27.80  | 25.75  | 26.77  | 36.06  | 84.72  | 32.33  | 17.70  | 29.30  | 13.40  | 12.31  | 11.42  | 52.00  | 72.50  | 46.50  | 78.70  | 62.10  |
| Bi | 0.11   | 0.10   | 0.09   | 0.10   | 0.10   | 0.10   | 0.10   | 0.09   | 0.10   | 0.10   | 0.10   | 0.15   | 0.16   | 0.22   | 0.13   | 0.24   |
| Th | 8.29   | 9.06   | 7.88   | 9.66   | 27.81  | 13.36  | 8.45   | 16.35  | 9.41   | 15.56  | 17.58  | 30.80  | 31.30  | 30.20  | 29.90  | 31.00  |

|                      |       |       |       |       |       |       |       |       |       |       |       |      |      |      |      |      |
|----------------------|-------|-------|-------|-------|-------|-------|-------|-------|-------|-------|-------|------|------|------|------|------|
| U                    | 3.92  | 2.92  | 2.71  | 3.44  | 6.64  | 2.76  | 2.70  | 2.63  | 2.83  | 3.31  | 3.18  | 5.53 | 5.74 | 5.84 | 4.87 | 5.88 |
| 10000Ga/<br>Al       | 3.75  | 3.71  | 3.73  | 3.31  | 3.83  | 3.91  | 3.79  | 3.94  | 3.80  | 3.60  | 3.70  | 4.34 | 4.45 | 4.33 | 4.31 | 4.37 |
| (La/Sm) <sub>N</sub> | 3.88  | 3.66  | 3.82  | 5.05  | 3.90  | 3.91  | 3.72  | 3.94  | 3.65  | 3.91  | 3.82  | 3.40 | 3.28 | 3.39 | 3.29 | 3.44 |
| (La/Yb) <sub>N</sub> | 20.47 | 17.31 | 23.04 | 47.64 | 33.60 | 25.39 | 19.14 | 24.89 | 20.45 | 27.60 | 26.09 | 9.33 | 9.15 | 9.47 | 9.30 | 9.35 |
| δEu                  | 0.01  | 0.01  | 0.01  | 0.01  | 0.00  | 0.01  | 0.01  | 0.01  | 0.01  | 0.01  | 0.01  | 0.02 | 0.01 | 0.01 | 0.01 | 0.02 |

Note: LOI, loss on ignition; subscript N-chondrite normalized value; A/CNK = (Al<sub>2</sub>O<sub>3</sub>)/(CaO + K<sub>2</sub>O+Na<sub>2</sub>O) molar ratio; A/NK = (Al<sub>2</sub>O<sub>3</sub>)/(K<sub>2</sub>O+Na<sub>2</sub>O) molar ratio; δEu= (Eu)<sub>N</sub>/[(Sm)<sub>N</sub> × (Gd)<sub>N</sub>]<sup>1/2</sup>;  
Chondrite REE values are after Sun et al. [\[72\]](#).
